# Supplementary material for: Controllable growth of a forest of silver nanowires and their field emission properties
Source: Royal Society of Chemistry journal article supplement (doi:10.1039/c4ce00977k), 2014-07-24
Supplement: c4ce00977k1.pdf [file c4ce00977k1.pdf]

**Electronic Supplementary Information**

**Controllable Growth of the Forest of Silver Nanowires and Their Field Emission**

**Property**

Changlong Jiang<sup>a\*</sup>, Shengjun Liu<sup>a</sup>, and Shaoming Yu<sup>b</sup>

<sup>a</sup> *Institute of Intelligent Machines, Chinese Academy of Sciences, Hefei, Anhui, 230031, China.*

<sup>b</sup> *School of Chemical Engineering, Hefei University of Technology and Anhui Key Laboratory of Controllable Chemical Reaction & Material Chemical Engineering, Hefei 230009, Anhui, China. E-mail: cljiang@iim.ac.cn*

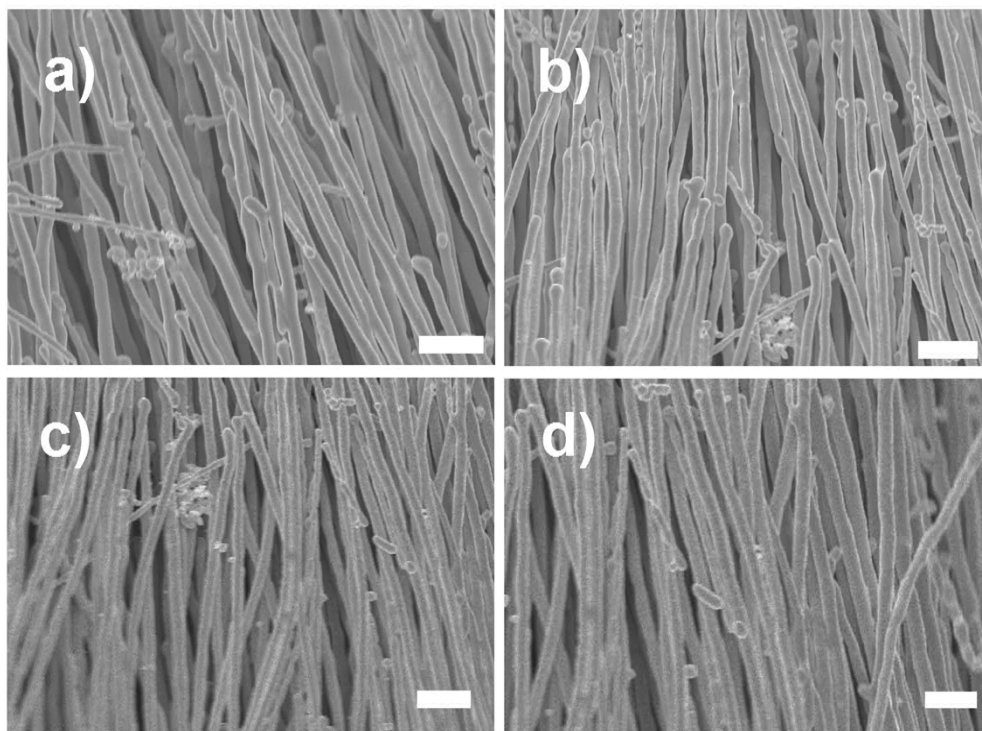

**Figure S1.** SEM images of Ag oriented nanowire arrays with different diameters.

a) 200nm-diameter Ag nanowires prepared at 40 °C; b) 250 nm-diameter Ag nanowires prepared at 50 °C; c) 300 nm-diameter Ag nanowires prepared at 70 °C; d) 400 nm-diameter Ag nanowires prepared at 90 °C. scale bar: 1  $\mu$ m

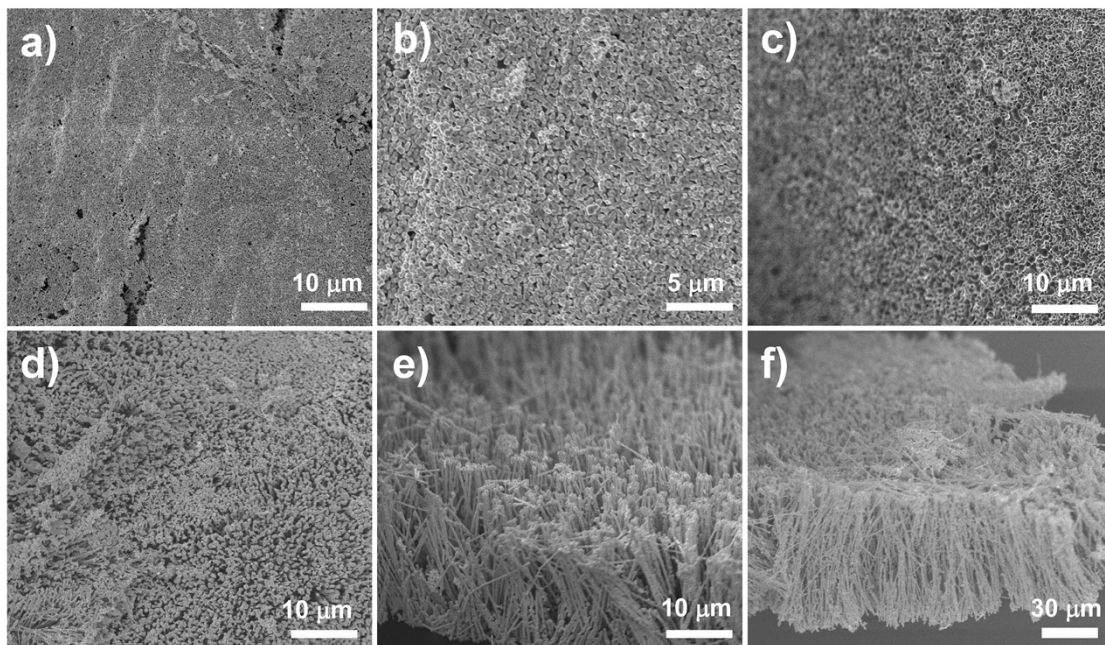

**Figure S2.** FESEM patterns of Ag products obtained at different time interval.

a) 10 min; b) 30 min; c) 1 h; d) 3 h; e) 12 h; f) 24 h.

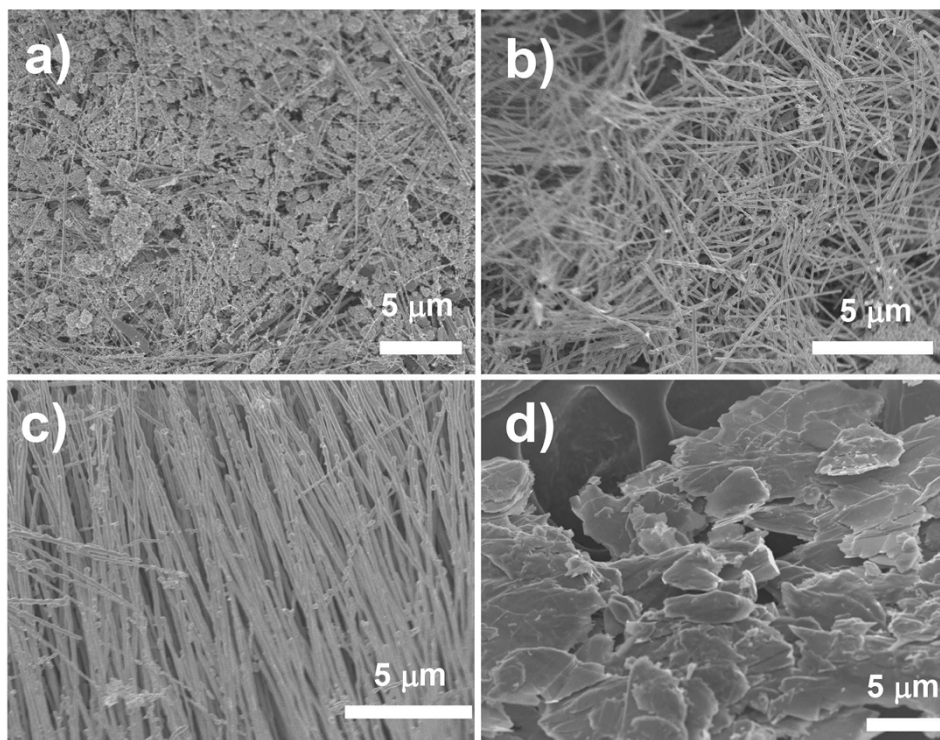

**Figure S3.** SEM images of Ag products with various concentrations of CTAB [mM]:

a) 15; b) 35; c) 55. d) 100
